# Supplementary material
Source: Springer Nature journal article supplement (https://www.springermedizin.de/resource/supplementary/12891_2014_2202_MOESM1_ESM.pdf/9509670)
Supplement: MOESM1 [file 9509670]

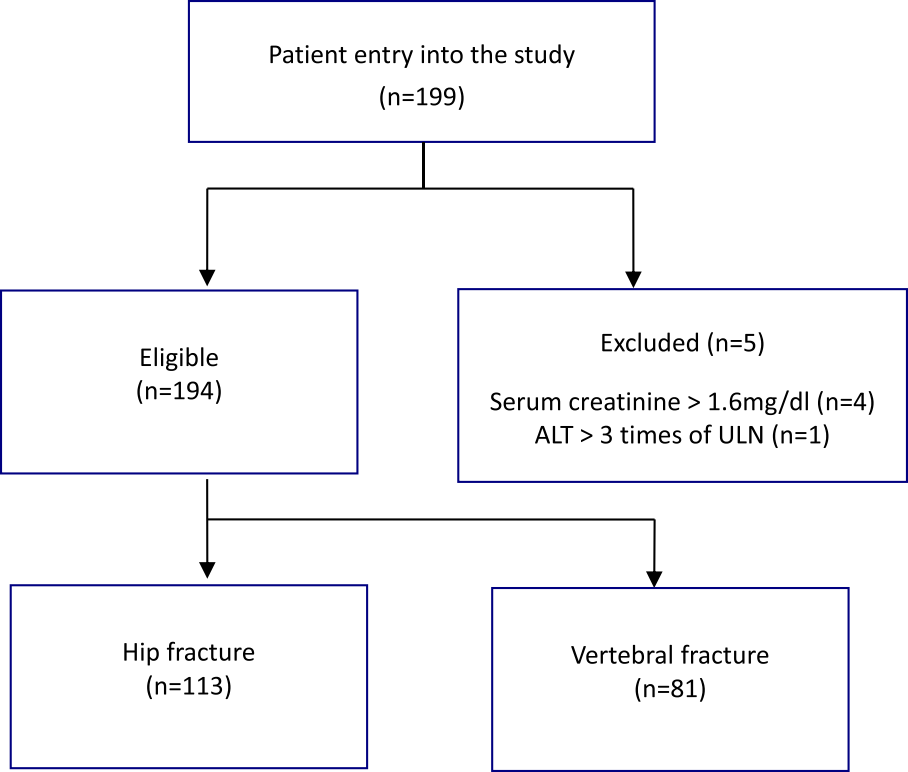

Patient entry into the study  
(n=199)

Eligible  
(n=194)

Excluded (n=5)

Serum creatinine > 1.6mg/dl (n=4)  
ALT > 3 times of ULN (n=1)

Hip fracture  
(n=113)

Vertebral fracture  
(n=81)
